# Supplementary material for: Tunable and sustainable photocatalytic activity of photochromic Y-WO3 under visible light irradiation
Source: Royal Society of Chemistry journal article supplement (doi:10.1039/d0ra09714d), 2021-01-01
Supplement: d0ra09714d1.pdf [file d0ra09714d1.pdf]

## Supporting information

### Tunable and Sustainable Photocatalytic Activity of Photochromic Y- WO<sub>3</sub> under Visible Light Irradiation

Qiansheng Li,<sup>a</sup> Hui Zhang,<sup>a</sup> Yunhui Yan,<sup>a</sup> Zhijun Yang,<sup>a</sup> Yingling Wang,<sup>a\*</sup> Guoguang Liu<sup>b,c</sup> and Tianjun Ni<sup>a,b\*</sup>

<sup>a</sup> School of Basic Medical Science, Xinxiang Medical University, Xinxiang 453003, China;

liqs1996@163.com (Q.L.); zhanghui610710@163.com (H.Z.); yanyunhui@xxmu.edu.cn (Y.Y.); zjyang@xxmu.edu.cn (Z.Y.)

<sup>b</sup> School of Environment, Henan Normal University, Xinxiang 453007, China

<sup>c</sup> Faculty of Environmental Science and Engineering, Guangdong University of Technology, Guangzhou 510006, China; liugg615@163.com (G.L.)

\* Correspondence: wang2002yl@126.com (Y. W.); tjni@xxmu.edu.cn (T.N.); Tel.: +86-373-3831859

#### Experimental part

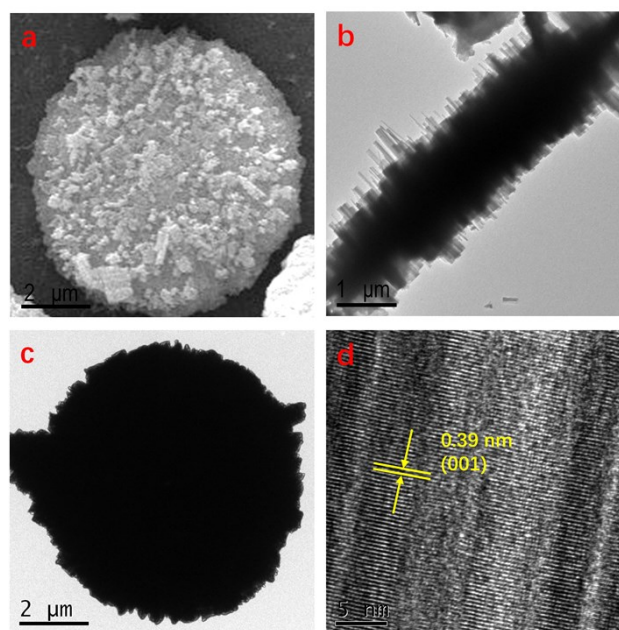

Fig. S1. SEM and TEM images of B-WO<sub>3</sub>; SEM (a); TEM (b, c); HRTEM (d).

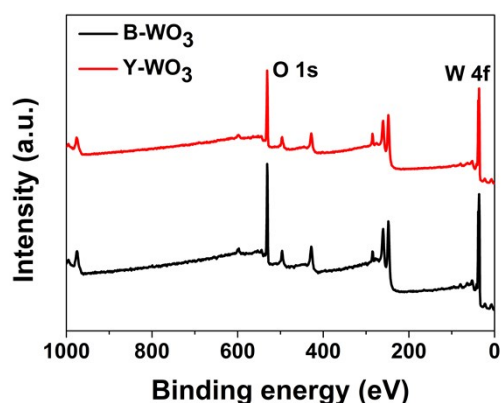

Fig. S2. Full XPS spectra of the as-synthesized samples.

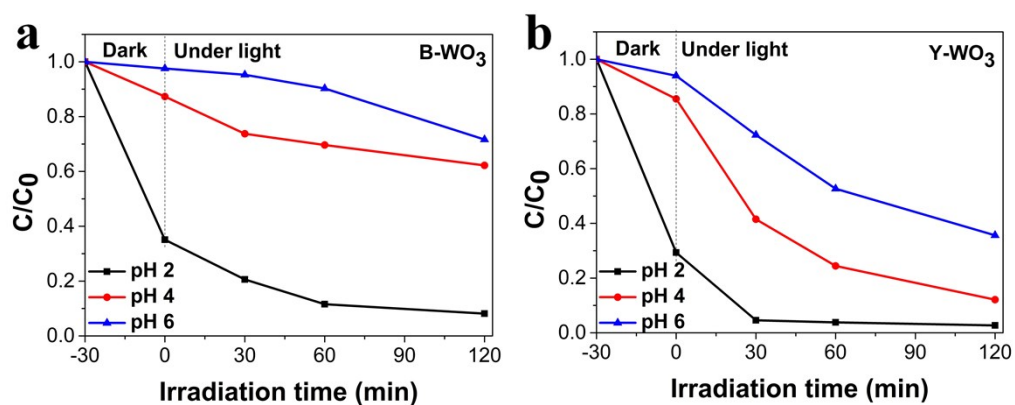

Fig. S3. Photodegradation activities of RhB under different pH values.

Taking the suitable adsorption-desorption equilibrium and high photocatalytic activity into consideration, the appropriate pH of 4 was adopted.

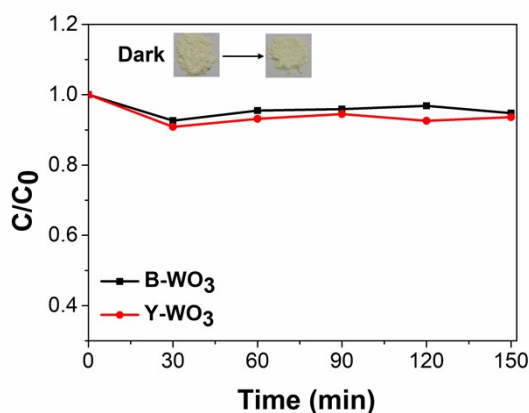

Fig. S4. The adsorption-desorption equilibrium of TCH in dark with the inserts for the color of Y-WO<sub>3</sub>.

When Y-WO<sub>3</sub> and B-WO<sub>3</sub> are both catalyzed under dark conditions for 150 min, the catalytic rates

of Y-WO<sub>3</sub> and B-WO<sub>3</sub> are almost at the same level and there is no obvious degradation and coloration of Y-WO<sub>3</sub>, indicating no transition from W<sup>6+</sup> to W<sup>5+</sup> under dark conditions.
